# Supplementary material for: Antiviral Action against SARS-CoV-2 of a Synthetic Peptide Based on a Novel Defensin Present in the Transcriptome of the Fire Salamander (Salamandra salamandra)
Source: MDPI journal article supplement (doi:10.3390/pharmaceutics16020190), 2024-01-29
Supplement: s1 [file s1]

## Antiviral Action against SARS-CoV-2 of a Synthetic Peptide Based on a Novel Defensin Present in the Transcriptome of the Fire Salamander (*Salamandra salamandra*)

Ana Luisa A. N. Barros <sup>1,2</sup>, Vladimir C. Silva <sup>3</sup>, Atvaldo F. Ribeiro-Junior <sup>1</sup>, Miguel G. Cardoso <sup>1,4</sup>, Samuel R. Costa <sup>5</sup>, Carolina B. Moraes <sup>6</sup>, Cecília G. Barbosa <sup>7</sup>, Alex P. Coleone <sup>8</sup>, Rafael P. Simões <sup>9</sup>, Wanessa F. Cabral <sup>1</sup>, Raul M. Falcão <sup>10</sup>, Andreanne G. Vasconcelos <sup>1,11</sup>, Jefferson A. Rocha <sup>12</sup>, Daniel D. R. Arcanjo <sup>13</sup>, Augusto Batagin-Neto <sup>8,14</sup>, Tatiana Karla S. Borges <sup>1</sup>, João Gonçalves <sup>4</sup>, Guilherme D. Brand <sup>5</sup>, Lucio H. G. Freitas-Junior <sup>7</sup>, Peter Eaton <sup>15,16</sup>, Mariela Marani <sup>17</sup>, Massuo J. Kato <sup>18</sup>, Alexandra Plácido <sup>15</sup> and José Roberto S. A. Leite <sup>1,\*</sup>

<sup>1</sup> Núcleo de Pesquisa em Morfologia e Imunologia Aplicada, NuPMIA, Faculdade de Medicina, Universidade de Brasília, UnB, Brasília 70910-900, DF, Brazil

<sup>2</sup> Programa de Pós-graduação em Medicina Tropical, PGMT, Faculdade de Medicina, Universidade de Brasília, UnB, Brasília 70910-900, DF, Brazil

<sup>3</sup> Laboratório de Vigilância Genômica e Biologia Molecular-Fundação Oswaldo Cruz Piauí, Teresina, PI 64001-350, Brazil

<sup>4</sup> imed.Ulisboa-Research Institute for Medicines, Faculty of Pharmacy, University of Lisbon, 1649-003 Lisbon, Portugal

<sup>5</sup> Instituto de Química, IQ, Universidade de Brasília, UnB, Brasília 70910-900, DF, Brazil

<sup>6</sup> Department of Pharmaceutical Sciences, Federal University of São Paulo, Diadema 09913-030, SP, Brazil

<sup>7</sup> Department of Microbiology, Institute of Biomedical Sciences, University of São Paulo, São Paulo 05508-000, SP, Brazil

<sup>8</sup> Programa de Pós-graduação em Ciência e Tecnologia de Materiais (POSMAT), School of Sciences, São Paulo State University (UNESP), Bauru 17033-360, SP, Brazil

<sup>9</sup> School of Agriculture, Department of Bioprocess and Biotechnology, São Paulo State University (UNESP), Botucatu 18618-689, SP, Brazil

<sup>10</sup> Bioinformatics Postgraduate Program, Metr pole Digital Institute, Federal University of Rio Grande do Norte, Natal 59078-900, RN, Brazil

<sup>11</sup> People&Science Pesquisa Desenvolvimento e Inova  o LTDA, Centro de Desenvolvimento Tecnol gico (CDT), Universidade de Bras lia, UnB, Bras lia 70910-900, DF, Brazil

<sup>12</sup> Campus S o Bernardo, Universidade Federal do Maranh o, UFMA, S o Bernardo 65550-000, MA, Brazil

<sup>13</sup> Department of Biophysics and Physiology, Federal University of Pia  , Teresina 64049-550, PI, Brazil

<sup>14</sup> Institute of Sciences and Engineering, S o Paulo State University (UNESP), Itapeva 18409-010, SP, Brazil

<sup>15</sup> Laborat rio Associado para a Qu mica Verde/Rede de Qu mica e Tecnologia (LAQV/REQUIMTE), Departamento de Qu mica e Bioqu mica, Faculdade de Ci ncias, Universidade do Porto, 4169-007 Porto, Portugal

<sup>16</sup> School of Chemistry, The Bridge, University of Lincoln, Lincoln LN6 7EL, UK

<sup>17</sup> IPEEC-CONICET, Consejo Nacional de Investigaciones Cient ficas y T cnicas, Puerto Madryn 9120, Argentina

<sup>18</sup> Instituto de Qu mica (IQ), Universidade de S o Paulo (USP), S o Paulo 05508-900, SP, Brazil

\* Correspondence: jrsaleite@gmail.com

## DOCKING SOLUTIONS

**ACE2-PEP-S1**

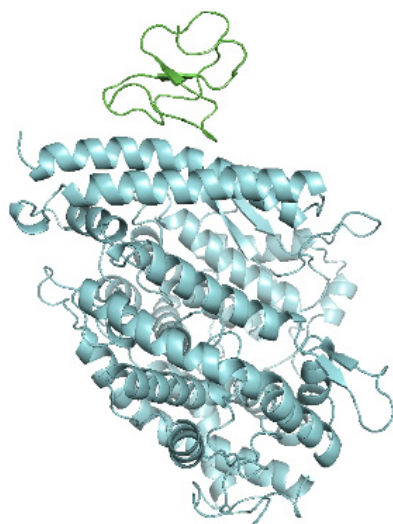

**ACE2-PEP-S2**

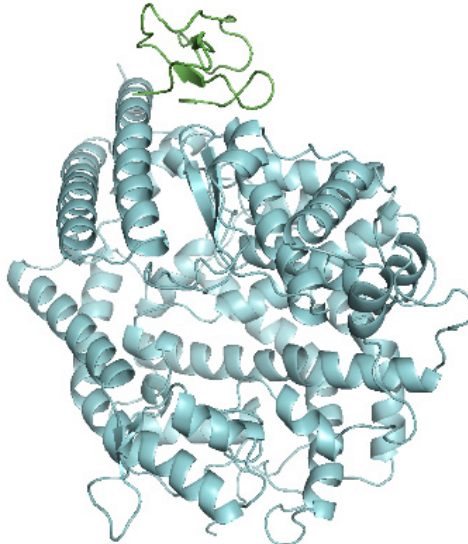

**SPIKE-PEP-S1**

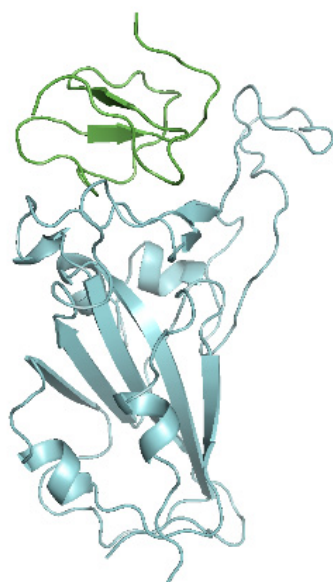

**SPIKE-PEP-S2**

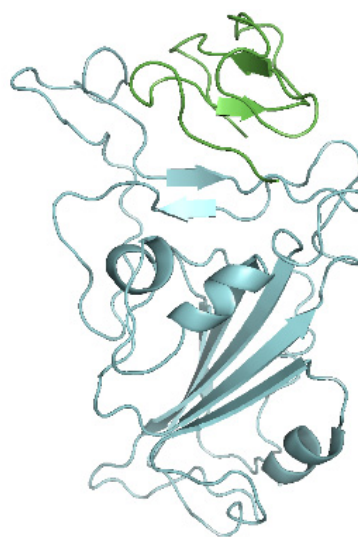

**Figure S1.** ACE2-PEP-S1, ACE2-PEP-S2, SPIKE-PEP-S1, and SPIKE-PEP-S2 molecular complexes obtained by docking analysis and used for MD simulations.

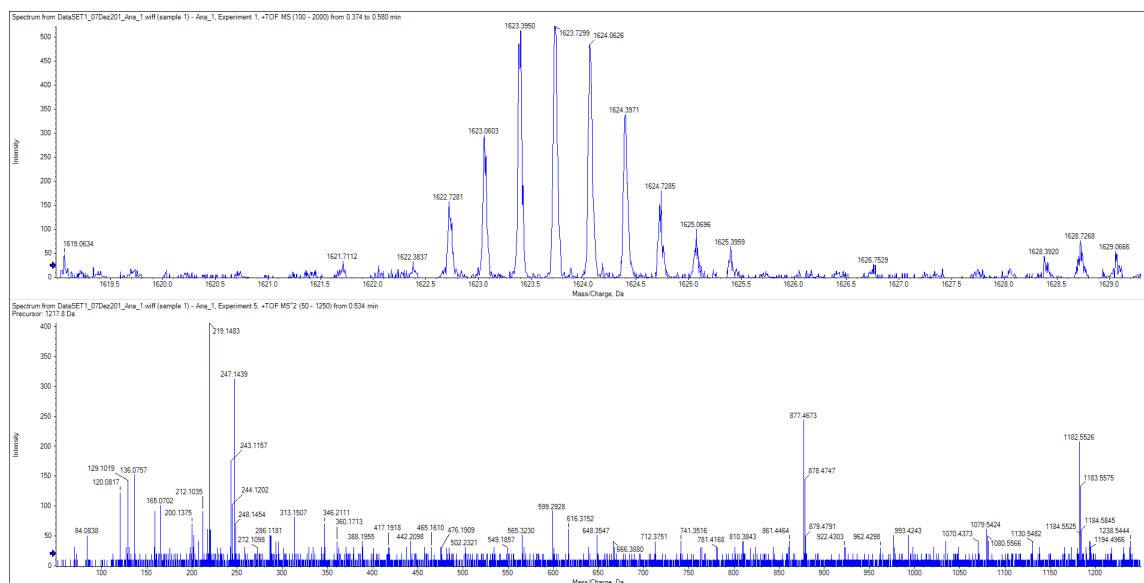

**Figure S2.** MS/MS Spectrum of the triply charged ion  $[M+3H]^{3+}$  of SS-I.
